# Supplementary material
Source: PubMed Central journal article supplement (PMC4256785)
Supplement: 5a5f369ca99f516d123a2c4fd0c92999_genetics.114.171322-3.pdf [file 5a5f369ca99f516d123a2c4fd0c92999_genetics.114.171322-3.pdf]

**Table S1 Variance components as a proportion of the total variance.**

| Variance Components   | P_A*  | M_A*  | P_AD* | M_AD* | P_A#A* | M_A#A* | P_D#D* | M_D#D* | P_A#D* | M_A#D* |
|-----------------------|-------|-------|-------|-------|--------|--------|--------|--------|--------|--------|
| Incomplete block      | 0.218 | 0.207 | 0.227 | 0.217 | 0.228  | 0.234  | 0.228  | 0.233  | 0.228  | 0.234  |
| Additive (Add)        | 0.320 | 0.347 | 0.235 | 0.199 | 0.233  | 0.088  | 0.228  | 0.139  | 0.231  | 0.125  |
| Dominance (Dom)       |       |       | 0.056 | 0.117 | 0.055  | 0.022  | 0.058  | 0.009  | 0.056  | 0.006  |
| Epistasis Add x Add   |       |       |       |       | 0.000  | 0.154  |        |        |        |        |
| Epistasis Dom x Dom   |       |       |       |       |        |        | 0.000  | 0.121  |        |        |
| Epistasis Add x Dom   |       |       |       |       |        |        |        |        | 0.000  | 0.135  |
| Culture x Add         | 0.017 | 0.013 | 0.010 | 0.014 | 0.000  | 0.001  | 0.008  | 0.008  | 0.008  | 0.006  |
| Culture x Dom         |       |       | 0.012 |       | 0.000  | 0.000  | 0.000  | 0.000  | 0.000  | 0.000  |
| culture x (Add x Add) |       |       |       |       | 0.026  | 0.025  |        |        |        |        |
| culture x (Dom x Dom) |       |       |       |       |        |        | 0.019  | 0.019  |        |        |
| culture x (Add x Dom) |       |       |       |       |        |        |        |        | 0.018  | 0.020  |
| Residual variance     | 0.445 | 0.433 | 0.460 | 0.452 | 0.459  | 0.475  | 0.458  | 0.471  | 0.459  | 0.473  |
| Total Variance        | 1.000 | 1.000 | 1.000 | 1.000 | 1.000  | 1.000  | 1.000  | 1.000  | 1.000  | 1.000  |

\*Each column represents a different model. See Table 1 for model description
