# Supplementary material
Source: PubMed Central journal article supplement (PMC4256785)
Supplement: 203b1a9fdff51b1d87747782c3f01f7b_genetics.114.171322-1.pdf [file 203b1a9fdff51b1d87747782c3f01f7b_genetics.114.171322-1.pdf]

**Table S1 Variance components as a proportion of the total variance.**

| Variance Components   | P_A*  | M_A*  | P_AD* | M_AD* | P_A#A* | M_A#A* | P_D#D* | M_D#D* | P_A#D* | M_A#D* |
|-----------------------|-------|-------|-------|-------|--------|--------|--------|--------|--------|--------|
| Incomplete block      | 0.218 | 0.207 | 0.227 | 0.217 | 0.228  | 0.234  | 0.228  | 0.233  | 0.228  | 0.234  |
| Additive (Add)        | 0.320 | 0.347 | 0.235 | 0.199 | 0.233  | 0.088  | 0.228  | 0.139  | 0.231  | 0.125  |
| Dominance (Dom)       |       |       | 0.056 | 0.117 | 0.055  | 0.022  | 0.058  | 0.009  | 0.056  | 0.006  |
| Epistasis Add x Add   |       |       |       |       | 0.000  | 0.154  |        |        |        |        |
| Epistasis Dom x Dom   |       |       |       |       |        |        | 0.000  | 0.121  |        |        |
| Epistasis Add x Dom   |       |       |       |       |        |        |        |        | 0.000  | 0.135  |
| Culture x Add         | 0.017 | 0.013 | 0.010 | 0.014 | 0.000  | 0.001  | 0.008  | 0.008  | 0.008  | 0.006  |
| Culture x Dom         |       |       | 0.012 |       | 0.000  | 0.000  | 0.000  | 0.000  | 0.000  | 0.000  |
| culture x (Add x Add) |       |       |       |       | 0.026  | 0.025  |        |        |        |        |
| culture x (Dom x Dom) |       |       |       |       |        |        | 0.019  | 0.019  |        |        |
| culture x (Add x Dom) |       |       |       |       |        |        |        |        | 0.018  | 0.020  |
| Residual variance     | 0.445 | 0.433 | 0.460 | 0.452 | 0.459  | 0.475  | 0.458  | 0.471  | 0.459  | 0.473  |
| Total Variance        | 1.000 | 1.000 | 1.000 | 1.000 | 1.000  | 1.000  | 1.000  | 1.000  | 1.000  | 1.000  |

\*Each column represents a different model. See Table 1 for model description

**Table S2 Estimates of genetic parameters (standard errors in parenthesis) and goodness-of-fit measures using Vitezica *et al.* (2013) parameterization.**

|             | P_A      | M_A      | P_AD     | M_AD     | P_A#A    | M_A#A    | P_D#D    | M_D#D    | P_A#D    | M_A#D    |
|-------------|----------|----------|----------|----------|----------|----------|----------|----------|----------|----------|
| $h^2$       | 0.32     | 0.347    | 0.235    | 0.239    | 0.233    | 0.10     | 0.228    | 0.162    | 0.231    | 0.149    |
| SE( $h^2$ ) | (0.017)  | (0.018)  | (0.047)  | (0.027)  | (0.047)  | (0.041)  | (0.046)  | (0.03)   | (0.047)  | (0.032)  |
| $d^2$       |          |          | 0.056    | 0.076    | 0.055    | 0.000    | 0.058    | 0.006    | 0.056    | 0.000    |
| SE( $d^2$ ) | na       | na       | (0.033)  | (0.02)   | (0.033)  | (0.000)  | (0.032)  | (0.023)  | (0.043)  | (0.000)  |
| $i^2$       |          |          |          |          | 0.000    | 0.164    | 0.000    | 0.112    | 0.000    | 0.124    |
| SE( $i^2$ ) | na       | na       | na       | na       | (0.000)  | (0.032)  | (0.000)  | (0.031)  | (0.000)  | (0.024)  |
| $H^2$       | 0.32     | 0.347    | 0.29     | 0.315    | 0.288    | 0.265    | 0.286    | 0.280    | 0.288    | 0.273    |
| SE( $H^2$ ) | (0.017)  | (0.018)  | (0.021)  | (0.018)  | (0.021)  | (0.019)  | (0.021)  | (0.018)  | (0.021)  | (0.018)  |
| LogL        | -1299.40 | -1323.73 | -1295.37 | -1306.69 | -1294.83 | -1293.75 | -1293.90 | -1294.81 | -1294.38 | -1293.55 |
| AIC         | 2606.80  | 2655.46  | 2602.74  | 2625.38  | 2605.66  | 2603.50  | 2603.80  | 2605.62  | 2604.76  | 2603.10  |

\*Each column represents a different model. See Table 1 for model description

**Table S3 Sampling correlation matrix for all models tested.** Above diagonal pedigree-based and below diagonal marker-based models. additive models 1 and 6 (A), additive plus dominance models 2 and 7 (B), additive plus dominance plus additive-by-additive models 3 and 8 (C), additive plus dominance plus dominance-by-dominance models 4 and 9 (D), and additive plus dominance plus additive-by-dominance models 5 and 10 (E). Estimated effects are Iblock = incomplete block, Add = Additive, Dom = dominance and Culture = silviculture type.

| <b>A</b>      | Iblock | Add   | Culture x Add | Residual |
|---------------|--------|-------|---------------|----------|
| Iblock        | 1.00   | 0.00  | 0.01          | -0.07    |
| Add           | 0.00   | 1.00  | -0.14         | -0.08    |
| Culture x Add | 0.01   | -0.08 | 1.00          | -0.24    |
| Residual      | -0.07  | -0.13 | -0.19         | 1.00     |

  

| <b>B</b>      | Iblock | Add   | Dom   | Culture x Add | Culture x Dom | Residual |
|---------------|--------|-------|-------|---------------|---------------|----------|
| Iblock        | 1.00   | 0.00  | 0.00  | 0.00          | 0.01          | -0.07    |
| Add           | 0.00   | 1.00  | -0.90 | -0.08         | 0.05          | -0.04    |
| Dom           | 0.00   | -0.70 | 1.00  | 0.09          | -0.15         | 0.02     |
| Culture x Add | 0.00   | -0.12 | 0.12  | 1.00          | -0.62         | 0.02     |
| Culture x Dom | 0.01   | 0.09  | -0.17 | -0.69         | 1.00          | -0.26    |
| Residual      | -0.07  | -0.05 | -0.02 | 0.00          | -0.19         | 1.00     |

  

| <b>C</b>              | Iblock | Add   | Dom   | Add x Add*        | Culture x Add | Culture x Dom | Culture x (Add x Add) | Residual |
|-----------------------|--------|-------|-------|-------------------|---------------|---------------|-----------------------|----------|
| Iblock                | 1.00   | 0.00  | 0.00  | -                 | -0.07         | -0.07         | 0.01                  | -0.07    |
| Add                   | 0.00   | 1.00  | -0.89 | -                 | -0.02         | -0.02         | -0.04                 | -0.02    |
| Dom                   | 0.00   | -0.31 | 1.00  | -                 | 0.01          | 0.01          | -0.07                 | 0.01     |
| Add x Add             | 0.00   | -0.52 | -0.52 | 1.00 <sup>+</sup> | -             | -             | -                     | -        |
| Culture x Add         | 0.00   | -0.09 | 0.00  | 0.13              | 1.00          | 1.00          | -0.30                 | 1.00     |
| Culture x Dom         | -0.07  | 0.01  | 0.00  | -0.02             | 0.13          | 1.00          | -0.30                 | 1.00     |
| Culture x (Add x Add) | 0.01   | 0.07  | 0.00  | -0.16             | -0.77         | -0.29         | 1.00                  | -0.30    |
| Residual              | -0.07  | 0.01  | 0.00  | -0.02             | 0.13          | 1.00          | -0.29                 | 1.00     |

| <b>D</b>              | Iblock | Add   | Dom   | Dom x Dom*        | Culture x Add | Culture x Dom | Culture x (Dom x Dom) | Residual |
|-----------------------|--------|-------|-------|-------------------|---------------|---------------|-----------------------|----------|
| Iblock                | 1.00   | 0.00  | 0.00  | -                 | 0.01          | -0.07         | 0.00                  | -0.07    |
| Add                   | 0.00   | 1.00  | -0.89 | -                 | -0.02         | -0.01         | -0.05                 | -0.01    |
| Dom                   | 0.00   | -0.45 | 1.00  | -                 | 0.04          | 0.01          | -0.07                 | 0.01     |
| Dom x Dom             | 0.00   | -0.27 | -0.58 | 1.00 <sup>+</sup> | -             | -             | -                     | -        |
| Culture x Add         | 0.00   | -0.09 | 0.00  | 0.11              | 1.00          | 0.02          | -0.48                 | 0.02     |
| Culture x Dom         | -0.07  | 0.00  | 0.01  | -0.01             | 0.04          | 1.00          | -0.31                 | 1.00     |
| Culture x (Dom x Dom) | 0.01   | 0.04  | 0.00  | -0.18             | -0.54         | -0.31         | 1.00                  | -0.31    |
| Residual              | -0.07  | 0.00  | 0.01  | -0.01             | 0.04          | 1.00          | -0.31                 | 1.00     |

  

| <b>E</b>              | Iblock | Add   | Dom   | Add x Dom*        | Culture x Add | Culture x Dom | Culture x (Add x Dom) | Residual |
|-----------------------|--------|-------|-------|-------------------|---------------|---------------|-----------------------|----------|
| Iblock                | 1.00   | 0.00  | 0.00  | -                 | 0.01          | -0.07         | 0.00                  | -0.07    |
| Add                   | 0.00   | 1.00  | -0.89 | -                 | -0.03         | -0.02         | -0.02                 | -0.02    |
| Dom                   | 0.00   | -0.40 | 1.00  | -                 | 0.06          | 0.01          | -0.10                 | 0.01     |
| Add x Dom             | 0.00   | -0.34 | -0.58 | 1.00 <sup>+</sup> | -             | -             | -                     | -        |
| Culture x Add         | 0.00   | -0.09 | 0.00  | 0.12              | 1.00          | 0.03          | -0.54                 | 0.03     |
| Culture x Dom         | -0.07  | 0.00  | 0.01  | -0.02             | 0.08          | 1.00          | -0.30                 | 1.00     |
| Culture x (Add x Dom) | 0.01   | 0.05  | 0.00  | -0.17             | -0.63         | -0.30         | 1.00                  | -0.30    |
| Residual              | -0.07  | 0.00  | 0.01  | -0.02             | 0.08          | 1.00          | -0.30                 | 1.00     |

\*Correlation of epistasis with other effects were not calculated in pedigree-based models as epistasis had no variance (See Table 2)

<sup>+</sup>Value from marker-base method
