# Supplementary material
Source: PubMed Central journal article supplement (PMC4256785)
Supplement: c688a9f89acf74e94e7de5caa876195c_genetics.114.171322-2.pdf [file c688a9f89acf74e94e7de5caa876195c_genetics.114.171322-2.pdf]

**Table S2 Estimates of genetic parameters (standard errors in parenthesis) and goodness-of-fit measures using Vitezica *et al.* (2013) parameterization.**

|             | P_A      | M_A      | P_AD     | M_AD     | P_A#A    | M_A#A    | P_D#D    | M_D#D    | P_A#D    | M_A#D    |
|-------------|----------|----------|----------|----------|----------|----------|----------|----------|----------|----------|
| $h^2$       | 0.32     | 0.347    | 0.235    | 0.239    | 0.233    | 0.10     | 0.228    | 0.162    | 0.231    | 0.149    |
| SE( $h^2$ ) | (0.017)  | (0.018)  | (0.047)  | (0.027)  | (0.047)  | (0.041)  | (0.046)  | (0.03)   | (0.047)  | (0.032)  |
| $d^2$       |          |          | 0.056    | 0.076    | 0.055    | 0.000    | 0.058    | 0.006    | 0.056    | 0.000    |
| SE( $d^2$ ) | na       | na       | (0.033)  | (0.02)   | (0.033)  | (0.000)  | (0.032)  | (0.023)  | (0.043)  | (0.000)  |
| $i^2$       |          |          |          |          | 0.000    | 0.164    | 0.000    | 0.112    | 0.000    | 0.124    |
| SE( $i^2$ ) | na       | na       | na       | na       | (0.000)  | (0.032)  | (0.000)  | (0.031)  | (0.000)  | (0.024)  |
| $H^2$       | 0.32     | 0.347    | 0.29     | 0.315    | 0.288    | 0.265    | 0.286    | 0.280    | 0.288    | 0.273    |
| SE( $H^2$ ) | (0.017)  | (0.018)  | (0.021)  | (0.018)  | (0.021)  | (0.019)  | (0.021)  | (0.018)  | (0.021)  | (0.018)  |
| LogL        | -1299.40 | -1323.73 | -1295.37 | -1306.69 | -1294.83 | -1293.75 | -1293.90 | -1294.81 | -1294.38 | -1293.55 |
| AIC         | 2606.80  | 2655.46  | 2602.74  | 2625.38  | 2605.66  | 2603.50  | 2603.80  | 2605.62  | 2604.76  | 2603.10  |

\*Each column represents a different model. See Table 1 for model description
