# Supplementary material
Source: PubMed Central journal article supplement (PMC4256785)
Supplement: de584c2eb41fa273d51d288a126b7c52_genetics.114.171322-4.pdf [file de584c2eb41fa273d51d288a126b7c52_genetics.114.171322-4.pdf]

**Table S3 Sampling correlation matrix for all models tested.** Above diagonal pedigree-based and below diagonal marker-based models. additive models 1 and 6 (A), additive plus dominance models 2 and 7 (B), additive plus dominance plus additive-by-additive models 3 and 8 (C), additive plus dominance plus dominance-by-dominance models 4 and 9 (D), and additive plus dominance plus additive-by-dominance models 5 and 10 (E). Estimated effects are Iblock = incomplete block, Add = Additive, Dom = dominance and Culture = silviculture type.

| <b>A</b>      | Iblock | Add   | Culture x Add | Residual |
|---------------|--------|-------|---------------|----------|
| Iblock        | 1.00   | 0.00  | 0.01          | -0.07    |
| Add           | 0.00   | 1.00  | -0.14         | -0.08    |
| Culture x Add | 0.01   | -0.08 | 1.00          | -0.24    |
| Residual      | -0.07  | -0.13 | -0.19         | 1.00     |

  

| <b>B</b>      | Iblock | Add   | Dom   | Culture x Add | Culture x Dom | Residual |
|---------------|--------|-------|-------|---------------|---------------|----------|
| Iblock        | 1.00   | 0.00  | 0.00  | 0.00          | 0.01          | -0.07    |
| Add           | 0.00   | 1.00  | -0.90 | -0.08         | 0.05          | -0.04    |
| Dom           | 0.00   | -0.70 | 1.00  | 0.09          | -0.15         | 0.02     |
| Culture x Add | 0.00   | -0.12 | 0.12  | 1.00          | -0.62         | 0.02     |
| Culture x Dom | 0.01   | 0.09  | -0.17 | -0.69         | 1.00          | -0.26    |
| Residual      | -0.07  | -0.05 | -0.02 | 0.00          | -0.19         | 1.00     |

  

| <b>C</b>              | Iblock | Add   | Dom   | Add x Add*        | Culture x Add | Culture x Dom | Culture x (Add x Add) | Residual |
|-----------------------|--------|-------|-------|-------------------|---------------|---------------|-----------------------|----------|
| Iblock                | 1.00   | 0.00  | 0.00  | -                 | -0.07         | -0.07         | 0.01                  | -0.07    |
| Add                   | 0.00   | 1.00  | -0.89 | -                 | -0.02         | -0.02         | -0.04                 | -0.02    |
| Dom                   | 0.00   | -0.31 | 1.00  | -                 | 0.01          | 0.01          | -0.07                 | 0.01     |
| Add x Add             | 0.00   | -0.52 | -0.52 | 1.00 <sup>+</sup> | -             | -             | -                     | -        |
| Culture x Add         | 0.00   | -0.09 | 0.00  | 0.13              | 1.00          | 1.00          | -0.30                 | 1.00     |
| Culture x Dom         | -0.07  | 0.01  | 0.00  | -0.02             | 0.13          | 1.00          | -0.30                 | 1.00     |
| Culture x (Add x Add) | 0.01   | 0.07  | 0.00  | -0.16             | -0.77         | -0.29         | 1.00                  | -0.30    |
| Residual              | -0.07  | 0.01  | 0.00  | -0.02             | 0.13          | 1.00          | -0.29                 | 1.00     |

| <b>D</b>              | Iblock | Add   | Dom   | Dom x Dom*        | Culture x Add | Culture x Dom | Culture x (Dom x Dom) | Residual |
|-----------------------|--------|-------|-------|-------------------|---------------|---------------|-----------------------|----------|
| Iblock                | 1.00   | 0.00  | 0.00  | -                 | 0.01          | -0.07         | 0.00                  | -0.07    |
| Add                   | 0.00   | 1.00  | -0.89 | -                 | -0.02         | -0.01         | -0.05                 | -0.01    |
| Dom                   | 0.00   | -0.45 | 1.00  | -                 | 0.04          | 0.01          | -0.07                 | 0.01     |
| Dom x Dom             | 0.00   | -0.27 | -0.58 | 1.00 <sup>+</sup> | -             | -             | -                     | -        |
| Culture x Add         | 0.00   | -0.09 | 0.00  | 0.11              | 1.00          | 0.02          | -0.48                 | 0.02     |
| Culture x Dom         | -0.07  | 0.00  | 0.01  | -0.01             | 0.04          | 1.00          | -0.31                 | 1.00     |
| Culture x (Dom x Dom) | 0.01   | 0.04  | 0.00  | -0.18             | -0.54         | -0.31         | 1.00                  | -0.31    |
| Residual              | -0.07  | 0.00  | 0.01  | -0.01             | 0.04          | 1.00          | -0.31                 | 1.00     |

  

| <b>E</b>              | Iblock | Add   | Dom   | Add x Dom*        | Culture x Add | Culture x Dom | Culture x (Add x Dom) | Residual |
|-----------------------|--------|-------|-------|-------------------|---------------|---------------|-----------------------|----------|
| Iblock                | 1.00   | 0.00  | 0.00  | -                 | 0.01          | -0.07         | 0.00                  | -0.07    |
| Add                   | 0.00   | 1.00  | -0.89 | -                 | -0.03         | -0.02         | -0.02                 | -0.02    |
| Dom                   | 0.00   | -0.40 | 1.00  | -                 | 0.06          | 0.01          | -0.10                 | 0.01     |
| Add x Dom             | 0.00   | -0.34 | -0.58 | 1.00 <sup>+</sup> | -             | -             | -                     | -        |
| Culture x Add         | 0.00   | -0.09 | 0.00  | 0.12              | 1.00          | 0.03          | -0.54                 | 0.03     |
| Culture x Dom         | -0.07  | 0.00  | 0.01  | -0.02             | 0.08          | 1.00          | -0.30                 | 1.00     |
| Culture x (Add x Dom) | 0.01   | 0.05  | 0.00  | -0.17             | -0.63         | -0.30         | 1.00                  | -0.30    |
| Residual              | -0.07  | 0.00  | 0.01  | -0.02             | 0.08          | 1.00          | -0.30                 | 1.00     |

\*Correlation of epistasis with other effects were not calculated in pedigree-based models as epistasis had no variance (See Table 2)

<sup>+</sup>Value from marker-base method
